# Supplementary material
Source: PubMed Central journal article supplement (PMC4063814)
Supplement: viru-5-534-s01.pdf [file viru-5-534-s01.pdf]

## **Supplemental Material to:**

**Kiley Dare, Jennifer Shepherd, Hervé Roy,  
Stephanie Seveau, and Michael Ibba**

**LysPGS formation in *Listeria monocytogenes* has broad  
roles in maintaining membrane integrity beyond  
antimicrobial peptide resistance**

**Virulence 2014; 5 (4)**

**<http://dx.doi.org/10.4161/viru.28359>**

**<http://www.landesbioscience.com/journals/virulence/article/28359/>**

**Table S1.** Phenotypes associated with loss of LysPGS in *Bacillus subtilis* as identified by phenotypic microarray

| Compound                                                         | Description                                                                                                                                                       |
|------------------------------------------------------------------|-------------------------------------------------------------------------------------------------------------------------------------------------------------------|
| Conditions under which LysPG formation provides resistance:      |                                                                                                                                                                   |
| Naladixic acid                                                   | Synthetic inhibitor of subunit A of DNA gyrase, quinolone                                                                                                         |
| Cefsulodin                                                       | Synthetic $\beta$ -lactam cephalosporin originally derived from the fungi <i>Acremonium</i>                                                                       |
| Azlocillin                                                       | Synthetic $\beta$ -lactam penicillin originally derived from the fungi <i>Penicillium</i> , blocks cell wall synthesis by inhibiting penicillin binding protein A |
| 3,5-Dinitrobenzene                                               | Ionophore                                                                                                                                                         |
| Phenylarsine oxide                                               | Membrane permeable protein tyrosine phosphatase inhibitor, inhibits the internalization of cell surface receptors                                                 |
| Chelerythrine                                                    | Alkaloid extracted from the plant <i>Celidonium majus</i> , cell permeable protein kinase C inhibitor                                                             |
| Amitriptyline                                                    | Inhibits mammalian proteins involved in rhodopsin-like receptor activity and inorganic ion transport metabolism                                                   |
| Protamine sulfate                                                | Highly cationic peptide isolate from salmon, known to bind heparin forming a stable ion that inhibits anti-coagulant effects                                      |
| Phleomycin                                                       | Isolated from <i>Streptomyces verticillus</i> , inhibit bacterial DNA synthesis                                                                                   |
| Coumarin                                                         | Secondary metabolite derived from phenylalanine in plants, disrupts bacterial membranes                                                                           |
| 5,7-Dichloro-8-hydroxyquinoline                                  | Inhibitor of PhoP induction in <i>Salmonella</i> , inhibits growth of <i>Mycobacterium tuberculosis</i> , associated with cation-Cl cotransporter inhibition      |
| 5-Chloro-7-iodo-8-hydroxyquinoline (Clioquinol)                  | Hydroxyquinoline used to treat amoebic infections, metal ionophore, inhibits proteasome function in cancer cells                                                  |
| Phenyl-methyl-sulfonyl-fluoride (PMSF)                           | Inhibitor that inactivates subtilisin and the fatty acid synthetase complex                                                                                       |
| Orphenadrine                                                     | Inhibits sodium channel protein type 10 subunit $\alpha$ , which mediates voltage-dependent sodium ion permeability of excitable membranes in rats                |
| Domiphen bromide                                                 | Cationic surfactant                                                                                                                                               |
| Chloroxylonol                                                    | Disrupts cell membrane potential                                                                                                                                  |
| Conditions under which LysPG formation increases susceptibility: |                                                                                                                                                                   |
| Furlatadone                                                      | Nitrofurantoin, damages bacterial DNA                                                                                                                             |
| Diamide                                                          | Forms disulfide bonds, inhibits protein activity                                                                                                                  |
| Sodium metaborate                                                | Inhibits transporters, toxic anion                                                                                                                                |
| Cefotaxime                                                       | Semisynthetic cephalosporin derivative, inhibits cell wall biogenesis by inactivating penicillin binding protein 3 (PBP3)                                         |
| Carbenicillin                                                    | Semisynthetic penicillin derivative, inhibits cell wall biogenesis by inactivating PBP3                                                                           |
| Lidocaine                                                        | Inhibits sodium channel protein type 10 subunit $\alpha$ , which mediates voltage-dependent sodium ion permeability of excitable membranes                        |
| Disulphiram                                                      | Inhibits aldehyde dehydrogenase in humans, used as an alcohol deterrent in humans, disturbs the efficiency of energy conversion                                   |

**Table S2.** Phenotypes associated with loss of LysPGS in *L. monocytogenes* as identified by phenotypic microarray

| Compound                                                                | Description                                                                                 |
|-------------------------------------------------------------------------|---------------------------------------------------------------------------------------------|
| <b>Conditions under which LysPG formation provides resistance:</b>      |                                                                                             |
| <b>Osmolytes</b>                                                        |                                                                                             |
| Urea 5%                                                                 |                                                                                             |
| NaCl 5%                                                                 |                                                                                             |
| Potassium chloride 3%                                                   |                                                                                             |
| Sodium sulfate 3%                                                       |                                                                                             |
| <b>Antimicrobial agents</b>                                             |                                                                                             |
| Tobramycin                                                              | Aminoglycoside, 5 amino groups inhibitor of 30S ribosomal subunit                           |
| Tannic acid                                                             | Polyphenol, used to disrupt membrane integrity                                              |
| Geneticin (G418)                                                        | Aminoglycoside, 4 amino groups inhibitor of lysine decarboxylase, and 30S ribosomal subunit |
| <b>Conditions under which LysPG formation increases susceptibility:</b> |                                                                                             |
| <b>Antimicrobial agents</b>                                             |                                                                                             |
| Sodium orthovanadate                                                    | Phosphatase inhibitor                                                                       |
| Chloroxylenol                                                           | Disrupts cell membrane potential                                                            |
| Niaproof                                                                | Anionic surfactant                                                                          |

**Table S3.** Primers used in *B. subtilis* 1A100  $\Delta$ lysPGS construction

| Primer name                | 5'-Sequence-3'                                     |
|----------------------------|----------------------------------------------------|
| I-SceI FF EcoRI            | GGAATTCGCA GCCATAACA CGCCAATCGT A                  |
| I-SceI FR XhoI             | GATGGCCGGG ACCTCGAGCG ACTTGTGATC GATAGGCGCA GTGAGT |
| I-SceI BF XhoI             | GTCGCTCGAG GTCCCGGCCA TCTTCGAAA TGTCATGCCG ATGTACC |
| I-SceI BR EcoRI            | TACCGAGCTC GAATTCCAGA AAGTTCAAGC AACAGCGAGG        |
| PE5916 integration         | GGGATGTGCT GCAAGGCGAT TAAG                         |
| I-SceI genomic integration | GCTGGCGAAA GGGGGATGTG CTGCA                        |
| Internal lysPGS left       | AAACGTTCTT ACACGATGGC                              |
| Internal lysPGS right      | CTTCAGCTCC TCCAAAACG                               |
